RESEARCH LETTER – Pathogens &amp; Pathogenicity

# Allicin from garlic inhibits the biofilm formation and urease activity of *Proteus mirabilis* in vitro

Mahsa Ranjbar-Omid<sup>1</sup>, Mohsen Arzanlou<sup>2,\*</sup>, Mojtaba Amani<sup>3</sup>,  
Seyyedeh Khadijeh Shokri Al-Hashem<sup>4</sup>, Nour Amir Mozafari<sup>5</sup>  
and Hadi Peeri Doghaheh<sup>2</sup>

<sup>1</sup>Young Researchers and Elite Club, Ardabil Branch, Islamic Azad University, Ardabil 56157, Iran, <sup>2</sup>Department of Microbiology, School of Medicine, Ardabil University of Medical Sciences, Ardabil 56189, Iran, <sup>3</sup>Department of Biochemistry, School of Medicine, Ardabil University of Medical Sciences, Ardabil 56189, Iran, <sup>4</sup>Department of Microbiology, School of Basic Sciences, Lahijan Branch, Islamic Azad University, Lahijan 44169, Iran and <sup>5</sup>Department of Microbiology, School of Medicine, Iran University of Medical Sciences, Tehran 14496, Iran

\*Corresponding author: Department of Microbiology, School of Medicine, Ardabil University of Medical Sciences, Ardabil 56189, Iran.  
Tel: +0098-45-33510057; Fax: +0098-45-33510060; E-mail: [M.arzanlou@arums.ac.ir](mailto:M.arzanlou@arums.ac.ir)

One sentence summary: Allicin from garlic inhibits the growth, biofilm formation and urease activity of *Proteus mirabilis* in vitro.

Editor: David Clarke

## ABSTRACT

Several virulence factors contribute to the pathogenesis of *Proteus mirabilis*. This study determined the inhibitory effects of allicin on urease, hemolysin and biofilm of *P. mirabilis* ATCC 12453 and its antimicrobial activity against 20 clinical isolates of *P. mirabilis*. Allicin did not inhibit hemolysin, whereas it did inhibit relative urease activity in both pre-lysed (half-maximum inhibitory concentration, IC<sub>50</sub> = 4.15 µg) and intact cells (IC<sub>50</sub> = 21 µg) in a concentration-dependent manner. Allicin at sub-minimum inhibitory concentrations (2–32 µg mL<sup>-1</sup>) showed no significant effects on the growth of the bacteria ( $P > 0.05$ ), but it reduced biofilm development in a concentration-dependent manner ( $P < 0.001$ ). A higher concentration of allicin was needed to inhibit the established biofilms. Using the microdilution technique, the MIC<sub>90</sub> and MBC<sub>90</sub> values of allicin against *P. mirabilis* isolates were determined to be 128 and 512 µg mL<sup>-1</sup>, respectively. The results suggest that allicin could have clinical applications in controlling *P. mirabilis* infections.

**Keywords:** allicin; *Proteus mirabilis*; antimicrobial; urease; hemolysin; biofilm

## INTRODUCTION

*Proteus mirabilis*, a member of the Enterobacteriaceae family, is one of the leading causes of urinary tract infections (UTIs) in patients with indwelling catheters or structural abnormalities in the urinary tract (Coker et al. 2000). *Proteus mirabilis* UTIs are most commonly associated with urinary tract obstruction, blockage of urinary catheters, bladder and kidney stone formation, and

bacteriuria. Intrinsically, *P. mirabilis* UTIs are often persistent and difficult to treat (Rozalski, Sidorczyk and Kotelko 1997). Furthermore, the development of extended spectrum beta-lactamase producing and multiple drug resistant strains of *P. mirabilis* (Mokracka, Gruszczynska and Kaznowski 2012; Kurihara et al. 2013) have made treating *P. mirabilis* infections more difficult. Therefore, finding antibiotics with new modes of action and alternatives to commonly used antimicrobial therapies for

Received: 24 November 2014; Accepted: 25 March 2015

© FEMS 2015. All rights reserved. For permissions, please e-mail: [journals.permissions@oup.com](mailto:journals.permissions@oup.com)

treating *P. mirabilis* infections is urgently needed. Neutralizing or suppressing the expression of the pathogen's virulence factors is desired to overcome infections (Fernebro 2011); it attenuates the pathogenicity of the bacterium and makes it easier for the host innate immune system to clear the infection (Fernebro 2011). *Proteus mirabilis* produces several potential virulence factors responsible for the pathogenicity of the organism, including urease and hemolysin (Rozalski, Sidorczyk and Kotelko 1997; Coker et al. 2000). Urease is produced by virtually all clinical strains of the bacterium (Rozalski, Sidorczyk and Kotelko 1997; Stankowska, Kwinkowski and Kaca 2008) and catalyzes the hydrolysis of urea to ammonia and carbon dioxide. Ammonia, a strongly alkaline agent, is a major cause of damage to host tissues. It has been shown that ammonia derivatives, such as ammonium hydroxide and monochloramine, are directly toxic to mammalian cells (Burne and Chen 2000). On the other hand, accumulation of ammonium increases the pH in surrounding tissues, thereby affecting the enzyme activities of the body system and triggering stone formation in the bladder and kidney (Griffith, Musher and Itin 1976; Burne and Chen 2000). Similarly, it has been demonstrated using animal models that urease-deficient *P. mirabilis* strains are less virulent and have lower 50% lethal dose (LD50) in comparison to parent strains (Jones et al. 1990). These findings are further supported by the fact that treating the animals with acetohydroxamic acid, a potent urease inhibitor, reduces the severity of *P. mirabilis* infection (Musher et al. 1975).

Hemolysin, another host damaging virulence factor of *P. mirabilis*, has cytotoxic effects on urinary tract epithelial cells (Mobley et al. 1991). It has been shown that hemolytic activity correlates with the cell invasiveness of *P. mirabilis* strains *in vitro* (Rozalski, Dlugonska and Kotelko 1986). This was further confirmed using a mouse model in which it was shown that the hemolysin-negative strains had higher LD50 than hemolysin-positive strains (Swihart and Welch 1990).

Biofilms, in particular crystalline biofilms, play a significant role in *P. mirabilis* UTIs. Biofilms protect organisms from the host immune system and antimicrobials (Jacobsen and Shirliff 2011). Crystalline biofilms make *P. mirabilis* UTIs more complicated. The crystallization of biofilms using magnesium phosphate and calcium phosphate leads to biofilm encrustation and blockage of indwelling catheters in patients with UTI (Mobley and Warren 1987).

According to the data presented above, urease, hemolysin and biofilm of *P. mirabilis* can be excellent therapeutic targets for treatment of *P. mirabilis* UTIs. This study aimed mainly to investigate the *in vitro* efficacy of allicin in neutralizing urease and hemolysin and to evaluate the effects of sub-inhibitory concentrations of allicin on biofilm formation in *P. mirabilis*. The antimicrobial activity of allicin against *P. mirabilis* strains was further evaluated. Allicin as the active principle of garlic extract possesses a number of pharmacological effects including antimicrobial activities (Harris et al. 2001). It has been shown that allicin could interfere with bacterial virulence factors in sub-minimum inhibitory concentrations (sub-MIC; Arzanlou and Bohlooli 2010a; Arzanlou et al. 2011; Leng et al. 2011).

## MATERIALS AND METHODS

### Bacterial strains, chemicals and media

A total of 20 clinical strains and one standard strain of *P. mirabilis* (ATCC 12453) were used in this study. Clinical strains were isolated from patients with UTIs admitted to a major university-affiliated teaching hospital (Imam Hospital, Ardabil University

of Medical Sciences) and further confirmed using standard biochemical tests. Bacteria were cultured on trypticase soy agar (TSA) slants for daily use and stored in a trypticase soy broth medium along with 15% glycerol, at  $-80^{\circ}\text{C}$  for subsequent uses. All chemicals and media were purchased from Merck (Darmstadt, Germany), except where noted.

### Allicin preparation and quantification

Allicin (purity  $\geq 95\%$ ) was purified from garlic extract using the semi-preparative HPLC method and quantified by analytical HPLC as described in detail by authors elsewhere (Arzanlou and Bohlooli 2010b; Arzanlou, Bohlooli and Ranjbar-Omid 2015).

### Antimicrobial susceptibility assay

The antimicrobial activity assay of allicin against *P. mirabilis* was performed using a microdilution method according to procedures recommended by the Clinical Laboratory Standards Institute (CLSI 2011). Briefly, 2-fold serial dilutions of allicin were prepared in sterile Mueller Hinton Broth (MHB) for a testing concentration range of 2–1024  $\mu\text{g mL}^{-1}$ . Then 100  $\mu\text{L}$  from each dilution was transferred into the well of a microtiter plate and inoculated with 5  $\mu\text{L}$  of standardized ( $1.5 \times 10^7$  CFU  $\text{mL}^{-1}$ ) cell suspension. Plates were incubated at  $37^{\circ}\text{C}$  overnight, and the lowest concentration of allicin that prevented visible growth was recorded as the MIC. Minimum bactericidal concentration (MBC) was determined by sub-culturing 10  $\mu\text{L}$  of broth from wells with no visible growth on TSA plates. The lowest concentration of allicin that killed 99.9% of the original inoculum was considered as MBC.

### Urease production and activity assay

A total of 50  $\mu\text{L}$  of overnight culture of *P. mirabilis* ATCC 12453 in MHB were transferred into 10 mL sterile MHB and additionally incubated 18 h at  $37^{\circ}\text{C}$  with constant shaking. The cells were pelleted by centrifugation at 1258  $g$  for 15 min ( $4^{\circ}\text{C}$ ). The pellet was washed three times with 10 mM  $\text{K}_2\text{HPO}_4$  solution and re-suspended in 2 mL of the same solution. Thereafter, to release the urease, bacteria were sonicated for 90 s with 0.5 cycles at 100% amplitude using an ultrasonicator (UP200H, Hielscher Ultrasonics, Teltow, Germany) in an ice container. The resulting bacterial lysate was used for urease activity assay. Urease activity assay was performed in a microtiter plate using the phenol red colorimetric method in a mixture containing 10 mM  $\text{K}_2\text{HPO}_4$  solution (pH 6.2), 0.002% phenol red and 500 mM urea (assay reagent). The increase in absorbance at 570 nm was recorded using a microplate reader (BioTek, USA) (Goldie et al. 1989; Tanaka, Kawase and Tani 2003). Activity was calculated using a standard curve relating to  $\text{NH}_3$  solutions of known concentration (Norris and Brocklehurst 1976) and expressed as  $\text{mmol NH}_3 \text{ min}^{-1} \text{ mg}^{-1}$  protein (Bauerfeind et al. 1997). In all experiments, the freshly prepared bacterial lysate was used. To obtain solutions with the same urease activity, the lysate was diluted to a defined specific activity (5.66  $\text{mmol NH}_3 \text{ min}^{-1} \text{ mg}^{-1}$  protein) with 10 mM  $\text{K}_2\text{HPO}_4$  and then the same volume used in different experiments.

### Inhibition of urease activity

To evaluate the inhibitory effects of allicin on urease, 15  $\mu\text{L}$  of bacterial lysates (approximately 1.7 mg protein) were pre-incubated with various concentrations of allicin (1, 3, 5 and 7  $\mu\text{g}$ ), for 30 min at  $37^{\circ}\text{C}$ , and then the urease activity was measured as described above. The positive control for the assay was

prepared in the same manner, but without the allicin. The absorbance values of each reaction were plotted against the time, and the residual activity was calculated by dividing the slope of the regression line obtained for each reaction by the slope of the positive control. Similar experiments were done to evaluate the inhibitory effects of iodoacetic acid (IAA) as a known urease inhibitor.

In parallel, to ensure that the color change was not due to allicin or urea, negative controls consisting of allicin without bacterial lysate or controls free of urea (with and without allicin) were included.

### Inhibition of urease inside the bacteria

The bacterial cell suspension with an optical density of 0.7 at a wave length of 620 nm in 10 mM  $K_2HPO_4$  solution (pH 6.2) was incubated with 10, 25, 50  $\mu\text{g}$  concentrations of allicin for 1 h at room temperature. Thereafter, the bacteria were harvested by centrifugation at 1258  $g$  for 10 min and washed three times with the same buffer to remove probable remaining allicin. Then, the bacteria were resuspended in 10 mM  $K_2HPO_4$  solution (pH 6.2) and lysed with an ultrasonicator, and the urease activity was assayed as described above.

### Effects of a reducing agent on urease re-activation

An experiment was conducted to elucidate whether the reducing agent dithiothreitol (DTT) could restore urease activity after incubation with allicin. A total of 15  $\mu\text{L}$  of bacterial lysates (approximately 1.7 mg protein) was pre-incubated with different inhibitory agents for 30 min at 37°C, and then the mixture was further incubated in the presence of 4  $\mu\text{L}$  DTT (5 mM final concentration) for 30 min at room temperature. The activity of urease was measured as described above, and residual activity was expressed as relative activity. In order to elucidate the molecular mechanism of urease inhibition, the same experiments were conducted on urease inhibited by IAA. Minimum concentrations of agents which fully inhibit urease were used in all experiments.

### Hemolysin production and hemolytic activity assay

Culture and disruption of *P. mirabilis* ATCC 12453 were performed in the same manner as urease production, except that the culture was carried out without shaking and the lysate was prepared in normal saline. The bacterial lysate was used for hemolytic activity assay which was carried out using human red blood cells (RBCs) according to the method previously described by authors (Arzanlou and Bohlooli 2010a). Briefly, hemolytic activity was determined with serial dilutions of bacterial lysate in normal saline. Washed human type O RBCs were added to the tubes to yield a final concentration of 2%. All tubes were incubated at 37°C for 30 min. The remaining intact erythrocytes were removed by gentle centrifugation at 805  $g$  for 2 min. The absorbance of released hemoglobin was determined at 541 nm using a spectrophotometer. The amount of hemolysin that produced 50% hemolysis was defined as 1 hemolytic unit (HU). Controls containing 2% erythrocytes and de-ionized water which were considered 100% hemolysis were used to determine the percentage of hemolysis. All experiments were conducted in triplicate.

### Assay of hemolytic activity inhibition

Inhibition studies of hemolytic activity in the presence of allicin were carried out according to the method previously described by authors (Arzanlou and Bohlooli 2010a). Bacterial lysates (200  $\mu\text{L}$ ;  $\sim 1$  HU) were pre-incubated with various concentrations (5, 10, 15, 20  $\mu\text{g}$ ) of allicin for 15 min at ambient temperature. Washed RBCs were added to yield a final concentration of 2%. All tubes were incubated at 37°C for 30 min. To remove the intact RBCs, tubes were centrifuged gently at 805  $g$  for 2 min. The absorbance of the released hemoglobin was determined at 541 nm. The positive control for the assay was prepared in the same manner, but without allicin. Activity without the inhibitor was considered to be 100%, and the residual activity at each concentration of allicin was determined relative to this value. In parallel, to ensure that the lysis was not due to the test material, a negative control consisting of allicin without bacterial lysate was included.

### Growth curve

A suspension of *P. mirabilis* ATCC 12453 and two representative clinical strains (with strong biofilm-forming abilities) with turbidities equal to McFarland turbidity standard No. 0.5 were prepared in normal saline. A total of 100  $\mu\text{L}$  of the suspensions was transferred into 10 mL sterile MHB ( $1.5 \times 10^7$  CFU  $\text{mL}^{-1}$ ) in 100 mL Erlenmeyer flasks containing 2, 4, 8, 16, 32, 64 and 128  $\mu\text{g}$   $\text{mL}^{-1}$  allicin. In parallel, a control without allicin was included. The flasks were incubated at 37 °C with constant shaking under aerobic conditions. The growth of cells was measured by reading the optical density (620 nm) of 100  $\mu\text{L}$  samples at 2 h intervals, up to 18 h. Optical density values from triplicate experiments were averaged and plotted against time points.

### Screening of strains for biofilm formation

To select the strains with strong biofilm-forming ability, all strains ( $n = 21$ ) were tested for their ability to form biofilm using polystyrene flat-bottomed microtiter plates (Orange Scientific, Belgium) as described by O'Toole et al. 1999 with some modifications. Briefly, 200  $\mu\text{L}$  of sterile MHB was dispensed into wells of a microtiter plate. The wells were inoculated with 10  $\mu\text{L}$  of standardized ( $1.5 \times 10^7$  CFU  $\text{mL}^{-1}$ ) cell suspension. The plates were incubated for 18 h at 37°C. Thereafter, the biofilm-coated wells of microtiter plates were washed three times with 300  $\mu\text{L}$  of sterile PBS (pH 7.4) to remove non-adherent cells, dried in an inverted position in room temperature. Afterwards, each of the washed wells was stained with 200  $\mu\text{L}$  of 0.2% safranin aqueous solution for 2 min and then washed three times with 300  $\mu\text{L}$  of sterile distilled water to remove excess dye. The bacteria were decolorized with 200  $\mu\text{L}$  of 95% ethanol for 15 min, then 150  $\mu\text{L}$  of the resolubilized dyes were transferred to a new well, and the amount of the safranin stain was measured with the microtiter plate reader at a 492 nm wavelength. To minimize background interface, controls including bacteria-free medium were included in each experiment, and the absorbance values for the controls were subtracted from the values for the test wells and defined as biofilm forming ability. All strains were tested in quadruplicate in three independent experiments.

Biofilm-forming ability was defined as strong ( $OD \geq 0.3$ ), moderate ( $0.2 \leq OD < 0.3$ ), weak ( $0.2 > OD \geq 0.1$ ) and negative ( $OD < 0.1$ ) (Wasfi et al. 2012).

### Effects on biofilm formation

In this study, *P. mirabilis* ATCC 12453 and two clinical strains with strong biofilm-forming abilities were included. The effect of sub-MIC concentrations of allicin on biofilm formation was evaluated according to the method described above, except that bacteria were cultured in the presence of defined concentrations (2, 4, 8, 16 and 32  $\mu\text{g mL}^{-1}$ ) of allicin. Biofilm formation without allicin was considered to be 100%, and the percentage of biofilm inhibition at each concentration of allicin was determined relative to this value.

### Effects on established biofilm

The effect of allicin on established biofilms was investigated as described by others with some modifications (Nostro *et al.* 2007). Bacteria were grown as biofilm using the same method described above. Planktonic phase cells were removed and the wells were washed three times with PBS. Then, the wells were filled with 200  $\mu\text{L}$  of 2-fold multiples of allicin in MHB, ranging from MIC to 5-fold multiples of MIC. The plates were incubated 24 h at 37°C. The biofilm inhibitory concentration (BIC) was defined as the lowest concentration where no visible growth was

observed. Samples of biofilms from the bottom of these wells were scarified by a metal loop, spread over the surface of TSA plates, and incubated for 72 h at 37°C. The biofilm eradication concentration (BEC) was taken as the minimum concentration at which viable cells could no longer be recovered from the biofilm directly.

### Statistical analysis

All experiments were repeated at least three times and obtained data was presented as mean  $\pm$  SD. Statistical analysis was performed using Student's t-test, and  $P < 0.05$  was considered significant. The half-maximum inhibitory concentration (IC<sub>50</sub>) values for the inhibition study of urease activity were calculated by fitting data to the Hill equation using SigmaPlot (version 11.0) software (Systat Software).

## RESULTS

### Purification of allicin

A typical representative chromatogram of purified allicin is shown in Fig. 1. As shown in the chromatogram, purified allicin

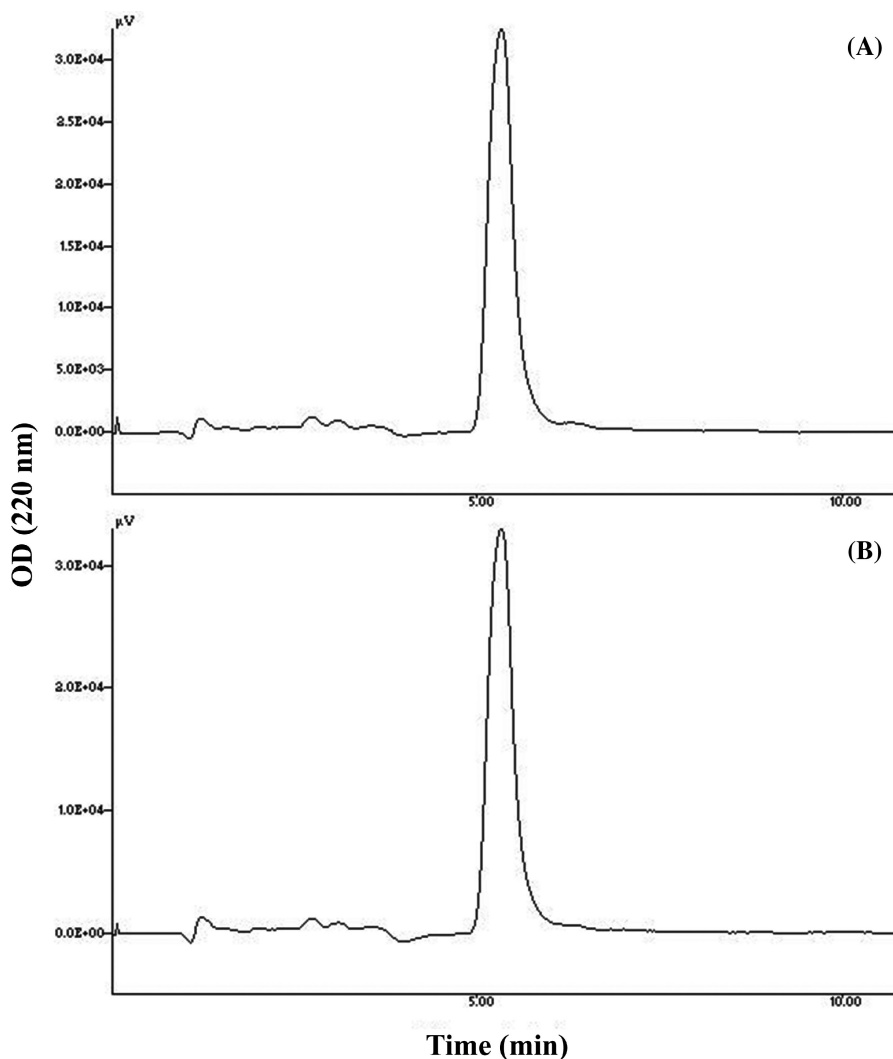

Figure 1. Representative chromatogram of purified (A) and standard (B) allicin using analytical HPLC.

**Table 1.** Susceptibility of *P. mirabilis* clinical strains to purified allicin.

| MIC ( $\mu\text{g mL}^{-1}$ ) | Strains n (%) | MBC ( $\mu\text{g mL}^{-1}$ ) | Strains n (%) |
|-------------------------------|---------------|-------------------------------|---------------|
| 64                            | 3 (14.3)      | 64                            | –             |
| 128                           | 18 (85.7)     | 128                           | 1 (4.7)       |
| 256                           | –             | 256                           | 9 (42.8)      |
| 512                           | –             | 512                           | 11 (52.4)     |
| Total                         | 21 (100)      | Total                         | 21 (100)      |

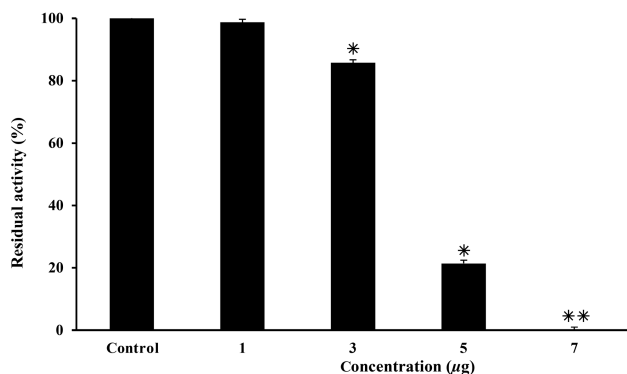

**Figure 2.** Inhibition of urease activity in bacterial cell lysate using allicin. Bacterial cell lysate was incubated for 30 min with defined concentrations of allicin and the urease activity was assayed. Results were obtained from three independent triplicate experiments. Relative activity was calculated in comparison to the allicin-free control and expressed as mean  $\pm$  SD. \*statistically significant ( $P < 0.05$ ) compared with the allicin-free control. \*\*statistically significant ( $P < 0.001$ ) compared with the allicin-free control.

yielded a single peak with a retention time of 6 min, inconsistent with standard allicin, and constituted  $\geq 95\%$  of the total detectable peak areas.

### Antimicrobial susceptibility assay

The results showed that allicin was active against *P. mirabilis* strains. The tested clinical isolates revealed the MICs of either 64 or 128  $\mu\text{g mL}^{-1}$  and MBCs of either 128 or 512  $\mu\text{g mL}^{-1}$  (Table 1). The MIC 90 and MBC 90 for tested strains were 128 and 512  $\mu\text{g mL}^{-1}$ , respectively. The MIC and MBC for the control strain tested (*P. mirabilis* ATCC 12453) were 64 and 128  $\mu\text{g mL}^{-1}$ , respectively.

### Inhibition of urease activity in bacterial lysate

The results showed that allicin decreased urease relative activity in a concentration-dependent manner. Fig. 2 represents the decrease of urease activity after 30 min pre-incubation with increasing concentrations of allicin. IC<sub>50</sub> was achieved with 4.15  $\mu\text{g}$  of allicin and 7  $\mu\text{g}$  completely inhibited urease compared with the allicin-free control. Urea-free controls showed no activity with or without allicin (data are not shown). Similar to allicin, IAA inhibited urease activity in a concentration-dependent manner, and maximum inhibition was achieved at 8  $\mu\text{g}$  (Fig. 3).

### Inhibition of urease activity inside the bacteria

The results showed that allicin easily diffused into bacteria and inhibited urease relative activity in a concentration-dependent manner. Fig. 4 shows that urease activity decreased as allicin concentrations increased after 30 min pre-incubation of intact

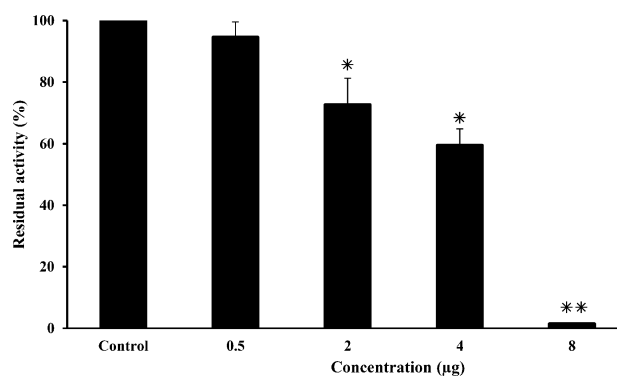

**Figure 3.** Inhibition of urease activity in bacterial cell lysate using IAA. Bacterial cell lysate was incubated for 30 min with defined concentrations of allicin and the urease activity was assayed. Results were obtained from three independent triplicate experiments. Relative activity was calculated in comparison to the IAA-free control and expressed as mean  $\pm$  SD. \*statistically significant ( $P < 0.05$ ) compared with the IAA-free control. \*\*statistically significant ( $P < 0.001$ ) compared with the IAA-free control.

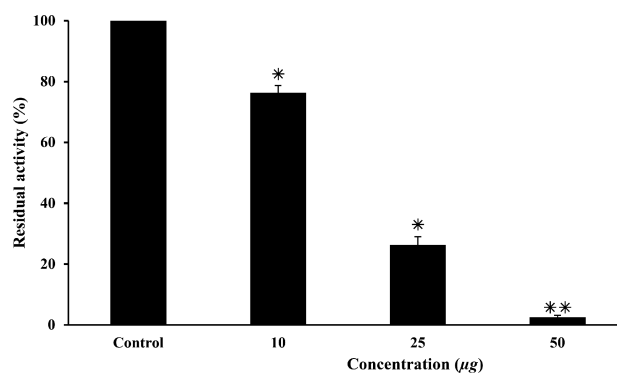

**Figure 4.** Inhibition of urease enzyme inside intact bacterial cell using allicin. The bacterial cells were disrupted after exposure to defined concentrations of allicin (30 min at room temperature) and the urease activity was assayed. Residual activity was calculated in comparison with the allicin-free control and expressed as mean  $\pm$  SD. Results were obtained from three independent triplicate experiments. \*statistically significant ( $P < 0.05$ ) compared with the allicin-free control. \*\*statistically significant ( $P < 0.001$ ) compared with the allicin-free control.

cells with allicin. The IC<sub>50</sub> was 21.01  $\mu\text{g}$ , while 50  $\mu\text{g}$  completely inhibited urease.

### Effects of a reducing agent on urease inhibition by allicin

Results indicated that the incubation of allicin-treated urease (7  $\mu\text{g}$ ) with 5 mM DTT restored its enzymatic activity ( $P > 0.001$ ). DTT did not restore the inhibitory effect of IAA (Fig. 5).

### Inhibition of hemolytic activity

As demonstrated in Fig. 6, allicin did inhibit the hemolytic activity of *P. mirabilis* hemolysin ( $P > 0.05$ ).

### Screening of strains for biofilm formation

Tested strains showed variable results in the aspect of biofilm formation. Most clinical strains as well as the *P. mirabilis* strain ATCC 12453 were put into the strong biofilm-former category (75, 20 and 5% were strong, moderate and weak biofilm-formers,

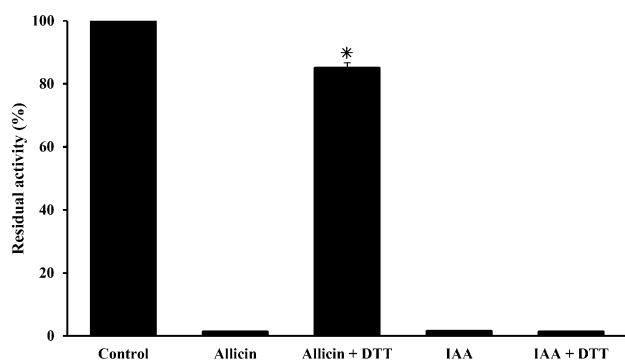

**Figure 5.** Effect of DTT on restoring urease activity after incubation with allicin and IAA. Bacterial cell lysate was incubated for 30 min with 7 and 8  $\mu\text{g}$  concentrations of allicin and IAA, respectively. The reactions were further incubated with DTT (5 mM) for 30 min. Residual activity was calculated in comparison with DTT-free controls and expressed as mean  $\pm$  SD. Results were obtained from three independent triplicate experiments. DTT did not restore the inhibitory effect of IAA ( $P > 0.05$ ). \*statistically significant ( $P < 0.001$ ) compared with the DTT-free control.

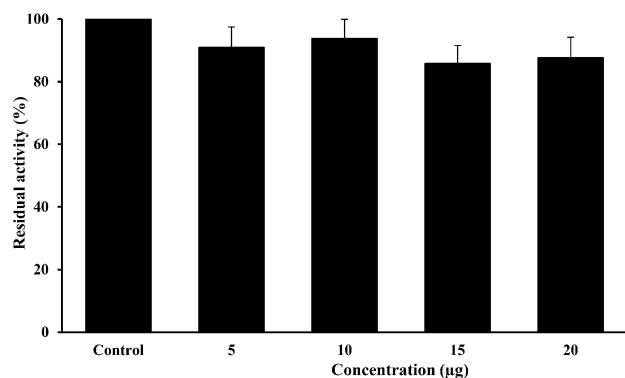

**Figure 6.** Inhibitory effects of allicin on the hemolytic activity of *P. mirabilis*. Bacterial lysate was pre-incubated for 30 min with various concentrations of pure allicin (5, 10, 15, 20  $\mu\text{g}$ ). Hemolytic activity was measured and residual activity was calculated in comparison with the allicin-free control. Results were obtained from three independent triplicate experiments and expressed as mean  $\pm$  SD. Allicin did not inhibit the hemolysin ( $P > 0.05$ ) compared with the allicin-free control.

respectively). Two isolates from the strongest biofilm-forming *P. mirabilis* strains were selected for biofilm inhibition studies.

### Effects of sub-inhibitory concentrations of allicin on *P. mirabilis* growth

Fig. 7 shows the growth curve of *P. mirabilis* strain ATCC 12453 in the presence of increasing concentrations of allicin. As shown in the figure, sub-MIC concentrations of allicin at 2–32  $\mu\text{g mL}^{-1}$  had no significant influence on *P. mirabilis* growth ( $P > 0.05$ ) at 18 h after the inoculation of bacteria into the culture medium. Allicin at 32  $\mu\text{g mL}^{-1}$  delayed bacteria growth in the first hours after the inoculation of bacteria into the culture medium, but increasing the incubation time up to 18 h produced no significant difference in growth compared with the allicin-free control ( $P > 0.05$ ). At concentrations equal to or above the MIC value, allicin completely inhibited growth. The growth of two clinical strains tested showed similar responses to allicin (data are not shown).

### Effects of allicin on biofilm development

Allicin reduced biofilm formation in a concentration-dependent manner in *P. mirabilis* (Fig. 8). Allicin at 16 and 32  $\mu\text{g mL}^{-1}$  showed the maximum reduction in biofilm development by  $28.9\% \pm 0.2$  and  $33.8\% \pm 1.0$  in *P. mirabilis* strain ATCC 12453,  $27.5\% \pm 0.3$  and  $35.1\% \pm 1.0$  in clinical isolate 1, and  $16.4\% \pm 0.1$  and  $25.7\% \pm 0.1$  in clinical isolate 2.

### Effects of allicin on established biofilm

The BIC and BEC of allicin for tested *P. mirabilis* strain ATCC 12453 were 2-fold (256  $\mu\text{g mL}^{-1}$ ) and 4-fold (512  $\mu\text{g mL}^{-1}$ ) greater than its MBC, respectively. The MIC and MBC values for this strain were 64 and 128  $\mu\text{g mL}^{-1}$  in MHB, respectively.

## DISCUSSION

The pathogenesis of *P. mirabilis* is multifactorial, and plenty of virulence factors work together to cause diseases. Inhibiting virulence factors could attenuate bacterium and enable the host immune system to combat disease. Wide varieties of natural products have been studied to inhibit *P. mirabilis* virulence factors (Wang et al. 2006; Carpinella et al. 2011; Cock and van Vuuren 2014; Packiavathy et al. 2014). The current study reports the inhibitory effects of allicin on the urease, hemolysin and biofilm of *P. mirabilis* as well as its antimicrobial activity against the bacterium. Allicin is a natural product derived from garlic (*Allium sativum*). It was found to inhibit the growth of a wide range of bacteria; it also showed antiparasitic, antifungal and antiviral activity in vitro (Harris et al. 2001). Allicin is commercially available, but its instability and high price limit the amount that can be used. Several previous studies on the antimicrobial activity of allicin have been carried out essentially with garlic extract rather than purified allicin. In this study, purified allicin was used in all experiments. The results showed that allicin inhibits the growth of the majority of *P. mirabilis* strains at concentrations lower than the MIC values previously reported to other Gram-negative bacilli, *Pseudomonas aeruginosa*, and oral anaerobic bacteria (Cai et al. 2007; Bachrach et al. 2011). Urease is suggested as an important target in the development of drugs for treating infection caused by urease positive bacteria (Follmer 2010). The activity of *P. mirabilis* ureases can be inhibited by substrate structural analogs of urea (such as hydroxyurea, thiourea, methylurea, and hydroxamic acid derivatives and phosphotriamides) and proton-pump inhibitors (such as rabeprazole, omeprazole and lansoprazole) (Follmer 2010). Proton-pump inhibitors indirectly inhibit urease. In a low pH environment, they are converted to sulfonamides which, in turn, inhibit urease via cysteine modification at the active site of the enzyme (Nagata et al. 1993; Tsuchiya et al. 1995). Unique features of bacterial urease are its association with nickel and its large number of cysteine residues (Rando et al. 1990). Cysteine-319 is key residue at the active site of *P. mirabilis* urease (Sriwanthana and Mobley 1993). Results of the current study showed that allicin efficiently inhibited *P. mirabilis* urease, likely via a mechanism involving the formation of a disulfide bond with reactive cysteine residue at the urease active site. This mechanism was further confirmed by the restoration of activity of the enzyme in the presence of a reducing agent, DTT. This is consistent with the proposed mode of action for allicin to form a disulfide bond with cysteine residue at the active site of enzymes, and consequently to inhibit the catalytic activity of urease (Rabinkov et al. 1998). Previous studies on jack bean urease (Juszkiewicz et al. 2003), microbial

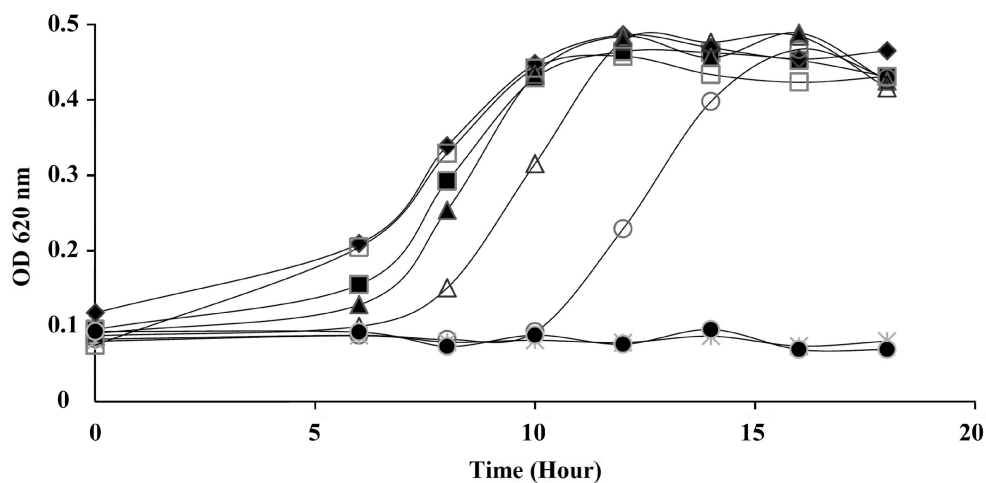

Figure 7. Growth curves of *P. mirabilis* strain ATCC 12453 cultured in MHB in presence of alliin. Alliin concentrations ( $\mu\text{g mL}^{-1}$ ): (filled square) 2, (filled diamond) 4, (filled triangle) 8, (open triangle) 16, (open circle) 32, (star) 64, (filled circle) 128, (open square) Control without alliin. The OD 620 nm was not statistically significant ( $P > 0.05$ ) compared with the alliin-free control at 18 h in sub-MIC concentrations.

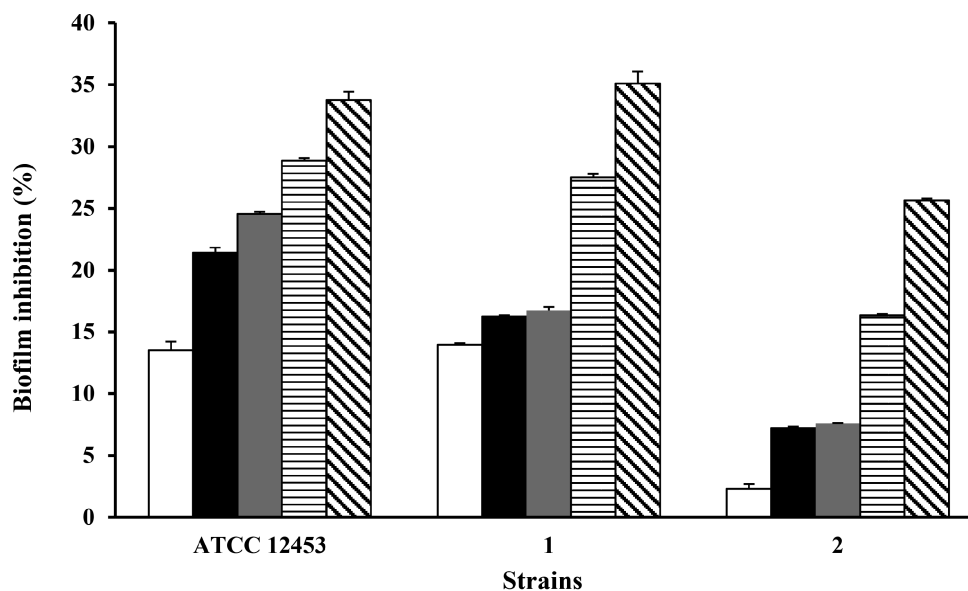

Figure 8. Inhibition of biofilm formation by sub-MIC concentrations of alliin. Bacteria were cultured in the presence of sub-MIC concentrations ( $\mu\text{g mL}^{-1}$ ) of alliin [(black filled square) 2, (open square) 4, (gray filled square) 8, (square filled with diagonal lines) 16, (square filled with horizontal lines) 32] for 18 h and biofilm development was assayed. Inhibition percentage was calculated in comparison with the alliin-free control and expressed as mean  $\pm$  SD. Results were obtained from three independent triplicate experiments. Statistically alliin (all concentrations) did inhibit biofilm formation compared with the alliin-free control ( $P < 0.001$ ).

SH-containing enzymes (Wills 1956; Wallock-Richards et al. 2014) and toxins (Arzanlou and Bohlooli 2010a; Arzanlou et al. 2011) suggested the same mode of action for alliin. This mechanism of action was further confirmed by comparison with IAA as an irreversible inhibitor of cysteine containing enzymes. IAA inhibits urease activity with the mechanism of inhibition occurring from the alkylation of the catalytic cysteine residue (Upadhyay 2012). As expected, DTT did not restore its activity.

Inhibition of urease inside the intact bacteria revealed that alliin efficiently diffuses into cytoplasm and inhibits urease. Previous studies indicated that alliin could easily pass through biological membranes (Miron et al. 2000). Passing through bacterial envelopes could be an excellent advantage of alliin over other urease inhibitors. A few urease inhibitors such as

hydroxamic acid derivatives are known to penetrate the *Helicobacter pylori* cells and inhibit urease activity inside the bacteria (Nakamura et al. 1998; Follmer 2010).

Significantly higher concentrations of alliin were required to completely inhibit urease activity inside intact cells compared to pre-lysed *P. mirabilis*. These results are consistent with previous reports showing that complete inhibition of *Entamoeba histolytica* cysteine proteases and *Streptococcus pneumoniae* pneumolysin in intact organisms occurs at higher concentrations compared with pre-lysed organisms (Ankri et al. 1997; Arzanlou et al. 2011). Complete inhibition for both was achieved at concentrations lower than MIC values as determined for *P. mirabilis* in this study. The low inhibitory concentration of alliin toward *P. mirabilis* urease is likely due to some alliin

features such as a high affinity toward -SH groups (Rabinkov et al. 1998; Arzanlou and Bohlooli 2010a; Arzanlou et al. 2011), low molecular weight and simple structure which make it easier to enter the active sites of sulfhydryl enzymes/toxins. However, several other factors including molecular structure (which may play a role in the inhibitor accessing active sites) and the concentration of enzymes influencing the inhibitory effect of allicin.

Allicin did not affect the hemolytic activity of *P. mirabilis* hemolysin in spite of previous studies by the authors on pneumolysin O (PLY) and streptolysin O (SLO) (Arzanlou and Bohlooli 2010a; Arzanlou et al. 2011). It was indicated that allicin inhibits PLY and SLO by binding to the cysteinyl residue in their binding sites (Arzanlou and Bohlooli 2010a; Arzanlou et al. 2011). Unlike PLY and SLO, the *P. mirabilis* hemolysin active site does not contain free cysteine residues in its structure, so the ineffectiveness of allicin on *P. mirabilis* hemolysin activity could be explained by the lack of free cysteine residues in its structure (Weaver et al. 2009). Beside the chemical inactivation of bacterial virulence factors by allicin, other studies showed that sub-MIC concentrations of allicin could reduce the production of *Staphylococcus aureus* hemolysin ( $\alpha$  toxin) at the genomic level (Leng et al. 2011).

The other experimental approach of the current study was to examine the effects of allicin on biofilm formation by *P. mirabilis* and its effect on established biofilms. Previous studies have shown that allicin could reduce biofilm formation in *S. epidermidis*, *P. aeruginosa* and *Candida albicans* at sub-MIC concentrations (Perez-Giraldo et al. 2003; Khodavandi et al. 2011; Lihua et al. 2013). The current study showed that allicin also can inhibit biofilm development in *P. mirabilis* at sub-MIC concentrations. In addition, allicin was found to be effective in inhibiting established biofilms at higher concentrations. These results are consistent with previous reports that state that bacteria are more resistant in biofilm than in planktonic growth (Patel 2005; Jacobsen and Shirliff 2011). Biofilms in particular crystalline biofilms play a significant role in *P. mirabilis* UTIs (Jacobsen and Shirliff 2011). Alkaline pH plays an essential role in the development of crystalline biofilms, so impeding the rise of urinary pH and subsequent crystallization could be a critical step in preventing biofilm formation. Urease inhibitors, such as flurofamide, have shown to reduce the development of crystalline biofilms, since they reduce pH and consequently reduce the deposition of calcium and magnesium salts on biofilm (Morris and Stickler 1998). As discussed earlier, allicin as a potent *P. mirabilis* urease inhibitor may prevent the development of crystalline biofilms in *P. mirabilis*. Therefore, further studies may be worthy of evaluation.

## CONCLUSION

The results of this study revealed that allicin inhibited the growth of *P. mirabilis*. This compound also reduced the biofilm development and neutralized the urease enzyme of *P. mirabilis*. The main drawback of clinical application of allicin is its instability in biological fluids (Freeman and Kodera 1995). It has been previously shown that allicin is broken down in the body (Rosen et al. 2001), and this limits its clinical application. Some studies examined the formation of allicin on target cells inside the body using pro-drug enzyme systems (Arditti et al. 2005; Appel et al. 2011). This system may be applied to control *P. mirabilis* UTIs using allicin. However, to achieve this goal further studies are needed.

## ACKNOWLEDGEMENTS

This work was performed in partial fulfillment of the requirements for an M.Sc. thesis in Microbiology (Mahsa Ranjbar Omid). We gratefully acknowledge Ardabil University of Medical Sciences for providing laboratory facilities for this work.

**Conflict of interest.** None declared.

## REFERENCES

- Ankri S, Miron T, Rabinkov A, et al. Allicin from garlic strongly inhibits cysteine proteinases and cytopathic effects of *Entamoeba histolytica*. *Antimicrob Agents Ch* 1997;41:2286–8.
- Appel E, Rabinkov A, Neeman M, et al. Conjugates of daidzein-alliinase as a targeted pro-drug enzyme system against ovarian carcinoma. *J Drug Target* 2011;19:326–35.
- Arditti FD, Rabinkov A, Miron T, et al. Apoptotic killing of B-chronic lymphocytic leukemia tumor cells by allicin generated in situ using a rituximab-alliinase conjugate. *Mol Cancer Ther* 2005;4:325–31.
- Arzanlou M, Bohlooli S. Inhibition of streptolysin O by allicin - an active component of garlic. *J Med Microbiol* 2010a;59:1044–9.
- Arzanlou M, Bohlooli S. Introducing of green garlic plant as a new source of allicin. *Food Chem* 2010b;120:179–83.
- Arzanlou M, Bohlooli S, Jannati E, et al. Allicin from garlic neutralizes the hemolytic activity of intra- and extra-cellular pneumolysin O in vitro. *Toxicon* 2011;57:540–5.
- Arzanlou M, Bohlooli S, Ranjbar-Omid M. Purification of allicin from garlic extract using semi-preparative HPLC. *Jundishapur J Nat Pharm Prod* 2015;10:e17424.
- Bachrach G, Jamil A, Naor R, et al. Garlic allicin as a potential agent for controlling oral pathogens. *J Med Food* 2011;14:1338–43.
- Bauerfeind P, Garner R, Dunn BE, et al. Synthesis and activity of *Helicobacter pylori* urease and catalase at low pH. *Gut* 1997;40:25–30.
- Burne RA, Chen YY. Bacterial ureases in infectious diseases. *Microbes Infect* 2000;2:533–42.
- Cai Y, Wang R, Pei F, et al. Antibacterial activity of allicin alone and in combination with beta-lactams against *Staphylococcus* spp. and *Pseudomonas aeruginosa*. *J Antibiot* 2007;60:335–8.
- Carpinella MC, DeBellis L, Joray MB, et al. Inhibition of development, swarming differentiation and virulence factors in *Proteus mirabilis* by an extract of *Lithrea molleoides* and its active principle (Z,Z)-5-(trideca-4',7'-dienyl)-resorcinol. *Phytomedicine* 2011;18:994–7.
- CLSI-Clinical Laboratory Standards Institute. *Methods for dilution antimicrobial susceptibility test for bacteria that grow aerobically: M07-A8*. Wayne, PA: Clinical Laboratory Standards Institute, 2011.
- Cock IE, van Vuuren SF. Anti-Proteus activity of some South African medicinal plants: their potential for the prevention of rheumatoid arthritis. *Inflammopharmacology* 2014;22:23–36.
- Coker C, Poore CA, Li X, et al. Pathogenesis of *Proteus mirabilis* urinary tract infection. *Microbes Infect* 2000;2:1497–505.
- Fernebro J. Fighting bacterial infections-future treatment options. *Drug Resist Update* 2011;14:125–39.
- Follmer C. Ureases as a target for the treatment of gastric and urinary infections. *J Clin Pathol* 2010;63:424–30.
- Freeman F, Kodera Y. Garlic chemistry: Stability of S-(2-propenyl)-2-propene-1-sulfinothioate (allicin) in blood, solvents, and simulated physiological fluids. *J Agr Food Chem* 1995;43:2332–8.



- Goldie J, Veldhuyzen van Zanten SJ, Jalali S, et al. Optimization of a medium for the rapid urease test for detection of *Campylobacter pylori* in gastric antral biopsies. *J Clin Microbiol* 1989;**27**:2080–2.
- Griffith DP, Musher DM, Itin C. Urease. The primary cause of infection-induced urinary stones. *Invest Urol* 1976;**13**:346–50.
- Harris JC, Cottrell SL, Plummer S, et al. Antimicrobial properties of *Allium sativum* (garlic). *Appl Microbiol Biot* 2001;**57**:282–6.
- Jacobsen SM, Shirliff ME. *Proteus mirabilis* biofilms and catheter-associated urinary tract infections. *Virulence* 2011;**2**:460–5.
- Jones BD, Lockatell CV, Johnson DE, et al. Construction of a urease-negative mutant of *Proteus mirabilis*: analysis of virulence in a mouse model of ascending urinary tract infection. *Infect Immun* 1990;**58**:1120–3.
- Juszkiewicz A, Zaborska W, Sepiol J, et al. Inactivation of jack bean urease by allicin. *J Enzym Inhib Med Ch* 2003;**18**:419–24.
- Khodavandi A, Harmal NS, Alizadeh F, et al. Comparison between allicin and fluconazole in *Candida albicans* biofilm inhibition and in suppression of HWP1 gene expression. *Phytotherapy* 2011;**19**:56–63.
- Kurihara Y, Hitomi S, Oishi T, et al. Characteristics of bacteremia caused by extended-spectrum beta-lactamase-producing *Proteus mirabilis*. *J Infect Chemother* 2013;**19**:799–805.
- Leng BF, Qiu JZ, Dai XH, et al. Allicin reduces the production of alpha-toxin by *Staphylococcus aureus*. *Molecules* 2011;**16**:7958–68.
- Lihua L, Jianhui W, Jialini Y, et al. Effects of allicin on the formation of *Pseudomonas aeruginosa* biofilm and the production of quorum-sensing controlled virulence factors. *Pol J Microbiol* 2013;**62**:243–51.
- Miron T, Rabinkov A, Mirelman D, et al. The mode of action of allicin: its ready permeability through phospholipid membranes may contribute to its biological activity. *Biochim Biophys Acta* 2000;**1463**:20–30.
- Mobley HL, Chippendale GR, Swihart KG, et al. Cytotoxicity of the HpmA hemolysin and urease of *Proteus mirabilis* and *Proteus vulgaris* against cultured human renal proximal tubular epithelial cells. *Infect Immun* 1991;**59**:2036–42.
- Mobley HL, Warren JW. Urease-positive bacteriuria and obstruction of long-term urinary catheters. *J Clin Microbiol* 1987;**25**:2216–7.
- Mokracka J, Gruszczynska B, Kaznowski A. Integrins, beta-lactamase and qnr genes in multidrug resistant clinical isolates of *Proteus mirabilis* and *P. vulgaris*. *APMIS* 2012;**120**:950–8.
- Morris NS, Stickler DJ. The effect of urease inhibitors on the encrustation of urethral catheters. *APMIS* 1998;**26**:275–9.
- Musher DM, Griffith DP, Yawn D, et al. Role of urease in pyelonephritis resulting from urinary tract infection with *Proteus*. *J Infect Dis* 1975;**131**:177–81.
- Nagata K, Satoh H, Iwahi T, et al. Potent inhibitory action of the gastric proton pump inhibitor lansoprazole against urease activity of *Helicobacter pylori*: unique action selective for *H. pylori* cells. *Antimicrob Agents Ch* 1993;**37**:769–74.
- Nakamura H, Yoshiyama H, Takeuchi H, et al. Urease plays an important role in the chemotactic motility of *Helicobacter pylori* in a viscous environment. *Infect Immun* 1998;**66**:4832–7.
- Norris R, Brocklehurst K. A convenient method of preparation of high-activity urease from *Canavalia ensiformis* by covalent chromatography and an investigation of its thiol groups with 2,2'-dipyridyl disulphide as a thiol titrant and reactivity probe. *Biochem J* 1976;**159**:245–57.
- Nostro A, Sudano Roccaro A, Bisignano G, et al. Effects of oregano, carvacrol and thymol on *Staphylococcus aureus* and *Staphylococcus epidermidis* biofilms. *J Med Microbiol* 2007;**56**:519–23.
- O'Toole GA, Pratt LA, Watnick PI, et al. Genetic approaches to study of biofilms. *Method Enzymol* 1999;**310**:91–109.
- Packiavathy IASV, Priya S, Pandia SK, et al. Inhibition of biofilm development of uropathogens by curcumin, an anti-quorum sensing agent from *Curcuma longa*. *Food Chem* 2014;**148**:453–60.
- Patel R. Biofilms and antimicrobial resistance. *Clin Orthop Relat R* 2005;**437**:41–7.
- Perez-Giraldo C, Cruz-Villalon G, Sanchez-Silos R, et al. In vitro activity of allicin against *Staphylococcus epidermidis* and influence of subinhibitory concentrations on biofilm formation. *J Appl Microbiol* 2003;**95**:709–11.
- Rabinkov A, Miron T, Konstantinovskii L, et al. The mode of action of allicin: trapping of radicals and interaction with thiol containing proteins. *Biochim Biophys Acta* 1998;**1379**:233–44.
- Rando D, Steglitz U, Morsdorf G, et al. Nickel availability and urease expression in *Proteus mirabilis*. *Arch Microbiol* 1990;**154**:428–32.
- Rosen RT, Hiserodt RD, Fukuda EK, et al. Determination of allicin, S-allylcysteine and volatile metabolites of garlic in breath, plasma or simulated gastric fluids. *J Nutr* 2001;**131**:968S–71S.
- Rozalski A, Dlugonska H, Kotelko K. Cell invasiveness of *Proteus mirabilis* and *Proteus vulgaris* strains. *Arch Immunol Ther Ex* 1986;**34**:505–12.
- Rozalski A, Sidorczyk Z, Kotelko K. Potential virulence factors of *Proteus* bacilli. *Microbiol Mol Biol R* 1997;**61**:65–89.
- Sriwanthana B, Mobley HL. *Proteus mirabilis* urease: histidine 320 of UreC is essential for urea hydrolysis and nickel ion binding within the native enzyme. *Infect Immun* 1993;**61**:2570–7.
- Stankowska D, Kwinkowski M, Kaca W. Quantification of *Proteus mirabilis* virulence factors and modulation by acylated homoserine lactones. *J Microbiol Immunol* 2008;**41**:243–53.
- Swihart KG, Welch RA. Cytotoxic activity of the *Proteus* hemolysin HpmA. *Infect Immun* 1990;**58**:1861–9.
- Tanaka T, Kawase M, Tani S. Urease inhibitory activity of simple alpha,beta-unsaturated ketones. *Life Sci* 2003;**73**:2985–90.
- Tsuchiya M, Imamura L, Park JB, et al. *Helicobacter pylori* urease inhibition by rabeprazole, a proton pump inhibitor. *Biol Pharm Bull* 1995;**18**:1053–6.
- Upadhyay LSB. Urease inhibitors: A review. *Indian J Biotechnol* 2012;**11**:381–8.
- Wallock-Richards D, Doherty CJ, Doherty L, et al. Garlic revisited: antimicrobial activity of allicin-containing garlic extracts against *Burkholderia cepacia* complex. *PLoS One* 2014;**9**:e112726.
- Wang WB, Lai HC, Hsueh PR, et al. Inhibition of swarming and virulence factor expression in *Proteus mirabilis* by resveratrol. *J Med Microbiol* 2006;**55**:1313–21.
- Wasfi R, Abd El-Rahman OA, Mansour LE, et al. Antimicrobial activities against biofilm formed by *Proteus mirabilis* isolates from wound and urinary tract infections. *Indian J Med Microbiol* 2012;**30**:76–80.
- Weaver TM, Smith JA, Hocking JM, et al. Structural and functional studies of truncated hemolysin A from *Proteus mirabilis*. *J Biol Chem* 2009;**284**:22297–309.
- Wills ED. Enzyme inhibition by allicin, the active principle of garlic. *Biochem J* 1956;**63**:514–20.
